# Supplementary material for: Limited ERG11 Mutations Identified in Isolates of Candida auris Directly Contribute to Reduced Azole Susceptibility
Source: PubMed Central journal article supplement (PMC6153782; doi:10.1128/aac.01427-18), 2018-09-24
Supplement: zac010187533s1.pdf [file zac010187533s1.pdf]

**Supplementary table 1. Primers used in this study.**

| <b>Primer*</b> | <b>Application</b> | <b>Sequence (5'-3')†</b>                                                                         |
|----------------|--------------------|--------------------------------------------------------------------------------------------------|
| CauERG11u376F  | PCR                | GCTCGGTTATCTGCTGACTC                                                                             |
| CauERG11d176R  | PCR                | GGAACCTTCAAGCTGAACTTG                                                                            |
| CauERG11c202R  | sequencing         | GCTGCATTCCGTAAACAACAG                                                                            |
| CauERG11c582R  | sequencing         | CTCAGGCTGAGTCTTCATC                                                                              |
| CauERG11c1215R | sequencing         | GGAGACCATCACGTAGTGAC                                                                             |
| CauERG11d176R  | sequencing         | GGAACCTTCAAGCTGAACTTG                                                                            |
| pRS-CauERG11F  | gap-repair cloning | GGCCCCCCTCGAGGTCGACGGTATCGATA<br>AGCTTGATATCGAATTCCTGCAGG <u>GCTCGGT</u><br><u>TATCTGCTGACTC</u> |
| pRS-CauERG11R  | gap-repair cloning | CAAAGCTGGAGCTCCACCGCGGTGGCGG<br>CCGCTCTAGAACTAGTGGATCC <u>GGAACCT</u><br><u>TCAAGCTGAACTTG</u>   |
| CauERG11c202R  | PCR screen         | GCTGCATTCCGTAAACAACAG                                                                            |
| T7             | PCR screen         | GCGTAATACGACTCACTATAGG                                                                           |
| T3             | PCR/sequencing     | AAGCGCGCAATTAACCCTCAC                                                                            |

\*Numbers in primer names correspond to nucleotide location upstream (u) or within the coding region (c) relative to the start codon, or downstream (d) relative to the stop codon.

†Underlined regions of gap-repair cloning primers correspond to *C. auris* *ERG11* upstream or downstream sequences, and non-underlined regions correspond to sequences on pRS416 surrounding *Sma*I restriction site.
